# Supplementary material for: Extending the vibroscape to agroecosystems: investigating the influence of abiotic factors and monitoring insect vibrational signaling
Source: PeerJ. 2022 Nov 17;10:e14143. doi: 10.7717/peerj.14143 (PMC9676016; doi:10.7717/peerj.14143)
Supplement: Supplemental Information 2 — The data of the field measurements in terms of signaling duration (in minutes) and corresponding parameters included in the model and the Fig. 1 and 2. The field measurements of signaling duration of the identified insects used for Fig. 3. The data of Scaphoideus titanus signaling duration in field and semi-field measurements that were used for Fig. 4. [file peerj-10-14143-s002.xlsx]

## Sheet: Sheet1
Site	X	Y	SA	Number of VSTs	Tp	RH	WV	AP	Position	Time	Date	Session
B8	66	15	10.1997	3	16.4	74	1.9	993	Border	7	8/4/2020	S1
M8	37	13	1.46083	3	16.1	81.9	1.9	991	Middle	7	8/3/2020	S1
M3	18	6	1.28684	2	18.1	82.6	1.7	993.7	Middle	7	7/19/2020	S1
M1	10	7	2.05536	4	18.3	84.9	1.2	991.3	Middle	8	7/12/2020	S1
M8	37	13	6.78237	6	18.3	76.8	1.7	991	Middle	8	8/3/2020	S1
B10	44	6	6.07125	3	18.7	98.8	1.7	991.2	Border	7	8/7/2020	S1
B7	14	16	14.038	4	18.8	84.4	1.8	993.3	Border	7	8/1/2020	S1
B8	66	15	4.5973	1	19	64.6	1.5	993.2	Border	8	8/4/2020	S1
M1	10	7	0.472998	1	19.2	79.1	1.9	990.9	Middle	9	7/12/2020	S1
M8	37	13	7.59822	6	19.7	71.4	2.1	990.6	Middle	9	8/3/2020	S1
B5	84	15	7.46756	1	19.7	85	3.6	982.5	Border	7	7/29/2020	S1
B10	44	6	1.11618	3	19.9	93.6	3	991.3	Border	8	8/7/2020	S1
M3	18	6	0	0	20	73.5	1.8	993.9	Middle	8	7/19/2020	S1
B10	44	6	15.0817	9	20.2	88.5	3.5	991.1	Border	9	8/7/2020	S1
B5	84	15	22.6959	2	20.6	80.8	3	983.2	Border	8	7/29/2020	S1
B2	19	4	7.11902	6	20.7	68.9	1.2	989.6	Border	8	7/8/2020	S1
M2	6	11	0.650317	6	20.7	66.6	1.2	991.3	Middle	8	6/17/2020	S1
B3	61	7	0.11058	1	20.7	63.8	2.9	988.7	Border	19	7/15/2020	S2
B8	66	15	8.15028	4	20.8	57.5	1.8	992.9	Border	9	8/4/2020	S1
B10	44	6	27.1566	6	21	84.2	3.5	990.8	Border	10	8/7/2020	S1
B11	46	7	0.239528	2	21	64.1	4.7	990.1	Border	7	8/13/2020	S1
M10	30	10	0.46398	2	21.2	92.4	0.8	989.8	Middle	7	8/12/2020	S1
B7	14	16	22.679	6	21.2	71.7	1.7	993.4	Border	8	8/1/2020	S1
M8	37	13	1.90425	6	21.2	64.7	2	990.2	Middle	10	8/3/2020	S1
M1	10	7	0.340877	2	21.3	69	1.8	990.1	Middle	10	7/12/2020	S1
B1	4	2	0.267645	1	21.6	67.2	2.2	995.9	Border	8	7/4/2020	S1
B11	46	7	0.121418	2	21.8	60.5	4.9	990.2	Border	8	8/13/2020	S1
M3	18	6	0.884643	2	21.9	67	1.6	993.6	Middle	9	7/19/2020	S1
B5	84	15	26.2096	2	22	75.2	2.3	983.5	Border	9	7/29/2020	S1
M2	6	11	0.625663	3	22.3	58.4	1.1	990.9	Middle	9	6/17/2020	S1
B10	44	6	10.1343	7	22.3	77.9	3.7	990.5	Border	11	8/7/2020	S1
B8	66	15	6.73765	1	22.4	52.9	1.6	992.6	Border	10	8/4/2020	S1
B2	19	4	6.77578	11	22.6	58.1	1.5	989.6	Border	9	7/8/2020	S1
M14	53	4	28.6053	7	22.7	66.3	2.2	995.4	Middle	20	8/21/2020	S2
M1	10	7	0.519527	1	23	62.8	2.6	989.5	Middle	11	7/12/2020	S1
B11	46	7	0	0	23	57.2	4.9	990.3	Border	9	8/13/2020	S1
B5	84	15	3.9407	3	23.1	68.9	1.5	983.6	Border	10	7/29/2020	S1
B1	4	2	0.40325	1	23.1	62.1	2.7	995.6	Border	9	7/4/2020	S1
B7	14	16	6.91408	5	23.2	63.4	1.2	993	Border	9	8/1/2020	S1
M12	39	9	13.8293	6	23.2	72.6	1.4	992.5	Middle	20	8/19/2020	S2
M8	37	13	4.33153	4	23.2	57.6	1.7	989.8	Middle	11	8/3/2020	S1
M6	68	12	1.87482	7	23.3	82	0.9	994.9	Middle	7	7/24/2020	S1
B10	44	6	13.0311	6	23.3	72.2	2.8	989.8	Border	12	8/7/2020	S1
M2	6	11	0.157572	2	23.5	53.9	1.1	990.3	Middle	10	6/17/2020	S1
B3	61	7	0.45274	1	23.6	53.5	1.6	987.8	Border	14	7/15/2020	S2
B12	13	14	2.94889	7	23.6	47.1	3.1	991.8	Border	20	8/16/2020	S2
B3	61	7	2.1568	6	23.7	50.9	3.4	988.1	Border	18	7/15/2020	S2
M3	18	6	0.242468	1	23.9	59.5	1.7	993.2	Middle	10	7/19/2020	S1
M14	53	4	11.627	4	24	60.3	2.5	995	Middle	19	8/21/2020	S2
M11	47	11	34.3745	11	24.3	51.1	3.2	988.8	Middle	20	8/15/2020	S2
B10	44	6	15.3616	13	24.4	67.5	1.9	989.1	Border	13	8/7/2020	S1
B3	61	7	0.1205	1	24.4	54.4	4.2	987.5	Border	15	7/15/2020	S2
B8	66	15	23.2184	1	24.5	45.6	1	992.1	Border	11	8/4/2020	S1
B3	61	7	0.46157	4	24.5	52.6	3.9	987.3	Border	16	7/15/2020	S2
B12	13	14	1.11265	7	24.5	43.6	4.2	991.3	Border	19	8/16/2020	S2
M1	10	7	0.0750033	1	24.6	55.1	1.3	988.6	Middle	12	7/12/2020	S1
B1	4	2	1.52576	4	24.6	57	2	995.2	Border	10	7/4/2020	S1
B2	19	4	2.31596	6	24.6	50.7	2.4	989.2	Border	10	7/8/2020	S1
B11	46	7	0	0	24.6	52.3	4.5	990	Border	10	8/13/2020	S1
B7	14	16	7.55477	5	24.7	58	1.7	992.4	Border	10	8/1/2020	S1
M11	47	11	7.27675	6	24.7	51	4.3	988.6	Middle	19	8/15/2020	S2
M12	39	9	28.4508	7	24.8	66.3	1.4	992.1	Middle	19	8/19/2020	S2
B2	19	4	1.24918	5	24.9	50	2.6	988.8	Border	11	7/8/2020	S1
M11	47	11	0.0900083	1	24.9	50.3	4.3	988.5	Middle	18	8/15/2020	S2
B9	12	5	49.9456	9	25	64.1	1.8	990	Border	20	8/5/2020	S2
M8	37	13	1.07622	3	25	51.8	2.1	989.1	Middle	12	8/3/2020	S1
M14	53	4	0.478502	5	25	56.8	3.3	994.9	Middle	18	8/21/2020	S2
B3	61	7	0.848277	7	25	51	3.6	987.5	Border	17	7/15/2020	S2
M12	39	9	0.038625	1	25.1	67.9	5.2	993	Middle	14	8/19/2020	S2
M2	6	11	0	0	25.3	50.9	0.8	989.3	Middle	11	6/17/2020	S1
M10	30	10	2.84011	5	25.4	69.3	0.5	989.6	Middle	8	8/12/2020	S1
M12	39	9	5.3405	8	25.4	63.2	1.7	992.1	Middle	18	8/19/2020	S2
B12	13	14	0.0131002	1	25.4	41.9	4.6	990.9	Border	18	8/16/2020	S2
B4	45	17	0.0716367	1	25.4	46.6	5.7	987.7	Border	19	7/16/2020	S2
M12	39	9	0	0	25.5	64.8	5.9	993	Middle	15	8/19/2020	S2
M14	53	4	0	0	25.6	53.4	6.6	996.7	Middle	14	8/21/2020	S2
M3	18	6	0.245407	2	25.7	52.8	1.4	992.6	Middle	11	7/19/2020	S1
B5	84	15	2.20092	1	25.7	59	3.9	983.4	Border	11	7/29/2020	S1
M14	53	4	0	0	25.8	54.6	4.2	995.2	Middle	17	8/21/2020	S2
B2	19	4	2.70454	8	25.9	48.4	3.4	988.3	Border	12	7/8/2020	S1
M6	68	12	5.38892	4	26	68.1	0.9	994.7	Middle	8	7/24/2020	S1
B1	4	2	9.85425	5	26	52.5	1.8	994.8	Border	11	7/4/2020	S1
M9	81	13	56.0046	10	26	61.9	2.7	987.8	Middle	20	8/7/2020	S2
M14	53	4	0	0	26	53.1	5.7	995.5	Middle	16	8/21/2020	S2
M1	10	7	0.054345	1	26.1	49.3	1.5	987.8	Middle	13	7/12/2020	S1
B2	19	4	1.39712	2	26.1	45.8	3.8	987.6	Border	13	7/8/2020	S1
M12	39	9	0.138557	1	26.1	60.6	5.1	992.4	Middle	16	8/19/2020	S2
M14	53	4	0	0	26.1	53.2	6.4	996	Middle	15	8/21/2020	S2
B8	66	15	10.0607	5	26.2	39.9	1	991.4	Border	12	8/4/2020	S1
B7	14	16	4.26251	2	26.2	52.4	1.6	991.8	Border	11	8/1/2020	S1
M12	39	9	0.532775	1	26.2	60.5	3.3	992.2	Middle	17	8/19/2020	S2
B5	84	15	4.02112	1	26.2	56.5	4.3	982.9	Border	12	7/29/2020	S1
B12	13	14	0	0	26.2	40.6	6	990.6	Border	17	8/16/2020	S2
B11	46	7	0.753488	6	26.3	45.4	5	989.3	Border	11	8/13/2020	S1
M11	47	11	0	0	26.5	45.2	5	989.6	Middle	15	8/15/2020	S2
M11	47	11	0	0	26.5	45.8	5.3	988.6	Middle	17	8/15/2020	S2
B9	12	5	39.0257	4	26.6	56.7	3.9	989.3	Border	19	8/5/2020	S2
M13	11	13	13.762	6	26.7	56.4	1.3	992.7	Middle	20	8/20/2020	S2
M10	30	10	2.34334	2	26.7	70.5	3.1	989.7	Middle	12	8/12/2020	S1
B4	45	17	0	0	26.8	42.2	5.7	987.5	Border	18	7/16/2020	S2
M10	30	10	0.422723	1	26.9	68.8	2.6	988.9	Middle	13	8/12/2020	S1
M11	47	11	0	0	26.9	44.4	4.2	990.2	Middle	14	8/15/2020	S2
M10	30	10	1.66985	6	27	62.4	0.9	989.5	Middle	9	8/12/2020	S1
B9	12	5	14.0909	7	27	55.8	3.6	989.1	Border	18	8/5/2020	S2
M11	47	11	0	0	27	44.2	5.4	989	Middle	16	8/15/2020	S2
M9	81	13	37.5703	9	27.1	53	3.3	986.8	Middle	19	8/7/2020	S2
B12	13	14	0	0	27.1	37.6	5.9	990.6	Border	16	8/16/2020	S2
M8	37	13	1.47941	4	27.2	46.1	1.2	988.5	Middle	13	8/3/2020	S1
B9	12	5	5.17364	6	27.2	55.1	3.1	989.2	Border	17	8/5/2020	S2
B5	84	15	5.2098	2	27.2	54.8	3.6	982.8	Border	13	7/29/2020	S1
B11	46	7	0.398238	4	27.2	43.6	4	988.6	Border	12	8/13/2020	S1
M10	30	10	2.82067	4	27.4	62.9	2.5	989.5	Middle	10	8/12/2020	S1
M2	6	11	0	0	27.5	47	0.8	988.4	Middle	12	6/17/2020	S1
M3	18	6	0.05033	1	27.5	47.1	1.1	992	Middle	12	7/19/2020	S1
M6	68	12	2.67328	7	27.5	61.5	1.2	994.4	Middle	9	7/24/2020	S1
M10	30	10	2.08708	5	27.5	65.9	1.8	989.2	Middle	11	8/12/2020	S1
B4	45	17	0.0397483	1	27.7	38.8	4.9	987.6	Border	17	7/16/2020	S2
B8	66	15	12.5417	3	27.9	39.2	1.2	990.6	Border	13	8/4/2020	S1
B7	14	16	20.3565	2	28	46.6	1	990.9	Border	12	8/1/2020	S1
M13	11	13	1.26511	1	28.3	56.4	2.7	993.5	Middle	14	8/20/2020	S2
B12	13	14	0.162497	4	28.3	34.1	4.3	990.9	Border	15	8/16/2020	S2
B4	45	17	0.323073	1	28.3	38.8	4.4	987.9	Border	16	7/16/2020	S2
B12	13	14	0	0	28.4	33.2	1.6	991.6	Border	14	8/16/2020	S2
B11	46	7	0.0969883	1	28.4	42.7	3.8	987.7	Border	13	8/13/2020	S1
B1	4	2	4.21779	4	28.5	45.7	0.9	994.2	Border	12	7/4/2020	S1
B4	45	17	0	0	28.5	35.3	3	988.7	Border	14	7/16/2020	S2
M2	6	11	1.50424	3	28.5	42.9	4.3	987.5	Middle	13	6/17/2020	S1
M3	18	6	0.294268	1	28.6	44.4	1.5	991.2	Middle	13	7/19/2020	S1
M9	81	13	9.20261	9	28.6	46.7	4.1	986.5	Middle	18	8/7/2020	S2
M13	11	13	15.0179	5	28.7	43.6	3	991.9	Middle	19	8/20/2020	S2
B4	45	17	0	0	28.7	35.3	4.2	988.1	Border	15	7/16/2020	S2
B6	31	4	18.8496	7	28.9	47.2	4.1	985.4	Border	20	7/30/2020	S2
M6	68	12	1.26824	5	29.1	55.4	1.1	993.9	Middle	10	7/24/2020	S1
M4	23	14	1.02859	3	29.2	52.3	2.9	995.6	Middle	20	7/22/2020	S2
B9	12	5	1.04259	2	29.2	47	4.4	989	Border	16	8/5/2020	S2
B6	31	4	19.9382	10	29.2	47.5	4.7	984.8	Border	19	7/30/2020	S2
B9	12	5	3.32076	1	29.3	50	2.9	989.7	Border	14	8/5/2020	S2
B7	14	16	16.2971	4	29.6	44.5	1	990.1	Border	13	8/1/2020	S1
M9	81	13	6.39968	3	29.6	48.9	1.2	987.2	Middle	14	8/7/2020	S2
M13	11	13	0.678873	2	29.7	41.7	3.3	991.7	Middle	18	8/20/2020	S2
B1	4	2	6.44258	5	29.8	42.2	1.1	993.4	Border	13	7/4/2020	S1
M4	23	14	1.97695	2	29.8	50	3.8	995.2	Middle	19	7/22/2020	S2
B9	12	5	0.753255	2	29.8	46.9	4.6	989.2	Border	15	8/5/2020	S2
M13	11	13	4.30281	4	30	50.6	1	992.8	Middle	15	8/20/2020	S2
M9	81	13	2.4989	2	30	45.3	4.1	986.5	Middle	17	8/7/2020	S2
B6	31	4	2.56226	3	30	49.5	5.4	984.4	Border	18	7/30/2020	S2
M9	81	13	0	0	30.1	47.3	4.4	986.4	Middle	16	8/7/2020	S2
B6	31	4	0.197038	1	30.1	51.7	5.2	984.3	Border	17	7/30/2020	S2
M5	28	8	0.084465	1	30.3	47.8	4.6	992.7	Middle	20	7/23/2020	S2
M13	11	13	0.785385	2	30.4	44.7	3.4	991.9	Middle	17	8/20/2020	S2
M13	11	13	2.36925	5	30.5	50.9	1.7	992.2	Middle	16	8/20/2020	S2
M9	81	13	0.122337	1	30.5	48.3	2.6	986.7	Middle	15	8/7/2020	S2
M5	28	8	0.908093	4	30.6	47.8	3.8	992.4	Middle	19	7/23/2020	S2
B6	31	4	0.200263	1	30.8	49.7	5.4	984.5	Border	16	7/30/2020	S2
M6	68	12	0.108007	1	31	49.6	1	993.1	Middle	11	7/24/2020	S1
M4	23	14	0	0	31	46	4.3	995	Middle	18	7/22/2020	S2
B6	31	4	0	0	31.2	48.9	5	984.8	Border	15	7/30/2020	S2
M4	23	14	0.0877683	1	31.7	44.9	4.2	995.1	Middle	17	7/22/2020	S2
B6	31	4	0	0	31.8	47.7	3.6	985.3	Border	14	7/30/2020	S2
M7	59	10	0	0	32.2	45.2	4.1	989.8	Middle	16	7/25/2020	S2
M6	68	12	0.229232	3	32.4	47.4	1.2	992.3	Middle	12	7/24/2020	S1
M4	23	14	2.43192	2	32.4	45.5	3.4	995.4	Middle	16	7/22/2020	S2
M7	59	10	0.676815	1	32.4	43.7	4.6	989.8	Middle	17	7/25/2020	S2
M5	28	8	0	0	32.4	43	4.7	992.2	Middle	18	7/23/2020	S2
M4	23	14	0.199853	1	32.6	39.8	1	996.6	Middle	14	7/22/2020	S2
M4	23	14	0	0	33.2	40.2	1.7	995.8	Middle	15	7/22/2020	S2
M7	59	10	0	0	33.3	44.1	4.6	989.8	Middle	15	7/25/2020	S2
M5	28	8	0	0	33.4	40	4.9	992.4	Middle	17	7/23/2020	S2
M6	68	12	0	0	33.9	45.9	2.1	991.5	Middle	13	7/24/2020	S1
M5	28	8	0	0	34	40.6	4.3	992.6	Middle	16	7/23/2020	S2
M5	28	8	0	0	34.2	40.7	2.6	993.6	Middle	14	7/23/2020	S2
M5	28	8	4.20368	5	34.2	40.9	4.3	993	Middle	15	7/23/2020	S2
M7	59	10	0	0	34.4	43.5	5.5	990.1	Middle	14	7/25/2020	S2

## Sheet: Sheet2
Period	Insect	Sum_SA_period	% SA_period_insect
Morning	BMSB	249.884	0.579143
Morning	ST	0.576235	0.00137551
Morning	others	181.012	0.419522
Afternoon	BMSB	24.0319	0.61385
Afternoon	ST	1.27618	0.0325977
Afternoon	others	13.8414	0.353552
Evening	BMSB	40.984	0.0982517
Evening	ST	284.75	0.682636
Evening	others	91.399	0.219112
Insect	Sum_SA_insect	% SA_insect
ST	286.603	0.323
BMSB	314.9	0.355
others	286.252	0.322

## Sheet: ST.field
SA_ST	Time
0	8
0	9
0	10
0	11
0	12
0	13
0	8
0	9
0	10
0	11
0	12
0	13
0	8
0	9
0	10
0	11
0	12
0	13
0	14
0	15
0	16
0	17
0	18
0	19
0	14
0	15
0	16
0	17
0	18
0	19
0	8
0	9
0	10
0	11
0	12
0	13
0	7
0	8
0	9
0	10
0	11
0	12
0	13
0.252636	14
0	15
0	16
0	17
0	18
0	19
0.429042	20
0.231453	14
0	15
0	16
0	17
0	18
1.04788	19
1.877	20
0	7
0	8
0.218561	9
0.194469	10
0	11
0	12
0.177947	13
0	14
0	15
0	16
0	17
0	7
0	8
0	9
0	10
0	11
0	12
0	13
0	14
0	15
0	16
0	17
0	18
13.6	19
27.5453	20
0	7
0	8
0	9
0	10
0	11
0	12
0	13
0	7
0	8
0	9
0	10
0	11
0	12
0	13
0	7
0	8
0	9
0	10
0	11
0	12
0	13
0	14
0	15
0	16
1.57851	17
16.7606	18
55.5186	19
72.0269	20
0	7
0	8
0	9
0	10
0	11
0	12
0	13
0.510713	14
0	15
0	16
0	17
3.79418	18
31.3862	19
63.612	20
0.0717407	7
0.1645	8
0.151108	9
0	10
0	11
0	12
0	13
0	7
0	8
0	9
0	10
0	11
0	12
0	13
0	14
0	15
0	16
0	17
0	18
8.12212	19
43.4611	20
0	14
0	15
0	16
0	17
0	18
0.70629	19
1.61635	20
0	14
0.064375	15
0	16
0	17
6.2115	18
43.8194	19
19.8561	20
0	14
0	15
0	16
0	17
0	18
15.661	19
20.9709	20
0	14
0	15
0	16
0	17
0.558406	18
13.9086	19
13.8304	20

## Sheet: ST.semi-field
SA_ST_SF	Time
1.10274	7
0	8
1.07764	9
0	10
0.664953	11
0.534533	12
1.4309	13
5.90559	7
1.32353	8
1.33008	9
0.238794	10
0.336489	11
2.06042	12
7.61467	13
0.977219	7
0.708428	8
0.639236	9
1.44991	10
1.69073	11
2.18348	12
0.669239	13
0.273083	7
0	8
0.610458	9
0.493508	10
0.268186	11
0.874356	12
0	13
0.261144	7
1.28031	8
2.50938	9
1.19674	10
10.4514	11
10.4942	12
0.756183	13
0.682706	7
0.675972	8
0.501469	9
1.09841	10
1.08376	11
2.0795	12
0	13
0.124089	14
0	15
0.142664	16
0.939586	17
7.02285	18
32.824	19
85.9184	20
2.69663	14
1.18466	15
2.0742	16
7.32936	17
15.5522	18
25.8739	19
18.8901	20
4.2865	14
6.05664	15
2.80329	16
10.6437	17
20.3218	18
24.7453	19
43.4726	20
3.59778	14
1.04029	15
2.03894	16
13.0369	17
41.1643	18
31.7477	19
23.8786	20
0	14
0.859172	15
1.61401	16
1.16564	17
3.3325	18
11.1079	19
2.76574	20
1.16703	14
0.306761	15
3.38538	16
1.11805	17
9.6707	18
39.9305	19
36.6201	20
